# Supplementary material for: Cs3Bi2I9 nanodiscs with phase and Bi(iii) state stability under reductive potential or illumination for H2 generation from diluted aqueous HI
Source: Royal Society of Chemistry journal article supplement (doi:10.1039/d1nr07008h), 2022-01-01
Supplement: d1nr07008h1.pdf [file d1nr07008h1.pdf]

## **Supporting Information**

### **Cs<sub>3</sub>Bi<sub>2</sub>I<sub>9</sub> Nanodiscs with Phase and Bi (III) State Stability under Reductive Potential or Illumination for H<sub>2</sub> Generation from Diluted Aqueous HI**

Sonu Pratap Chaudhary,<sup>1</sup> Subhajit Bhattacharjee,<sup>1</sup> Vishwadeepa Hazra,<sup>1</sup> Sanjib Shyamal,<sup>2</sup> Narayan Pradhan,<sup>2</sup> and Sayan Bhattacharyya<sup>1,\*</sup>

*<sup>1</sup>Department of Chemical Sciences and Centre for Advanced Functional Materials, Indian Institute of Science Education and Research (IISER) Kolkata, Mohanpur - 741246, India*

*<sup>2</sup>School of Materials Sciences, Indian Association for the Cultivation of Science, Kolkata 700032, India*

*\*Email for correspondence: [sayanb@iiserkol.ac.in](mailto:sayanb@iiserkol.ac.in)*

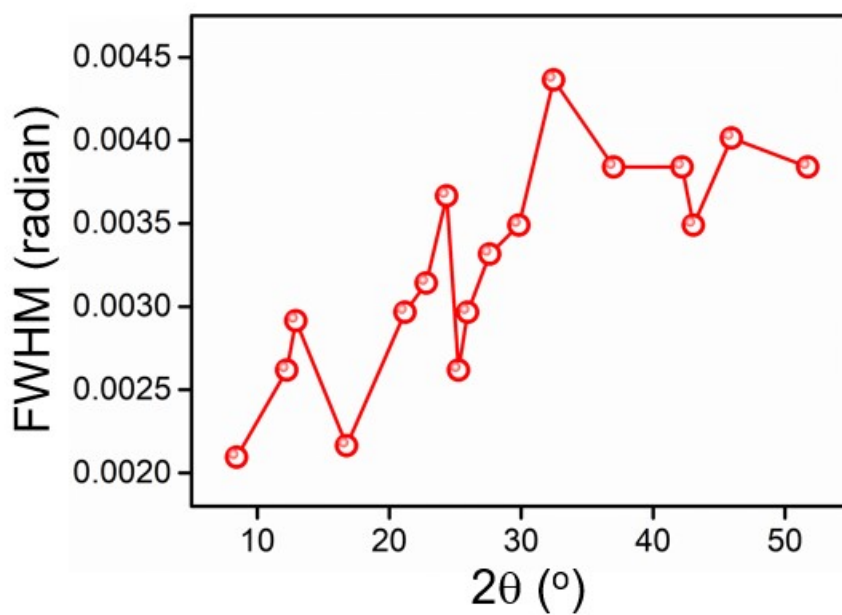

**Figure S1.** Variation of FWHM with  $2\theta$  for  $\text{Cs}_3\text{Bi}_2\text{I}_9$  NDs.

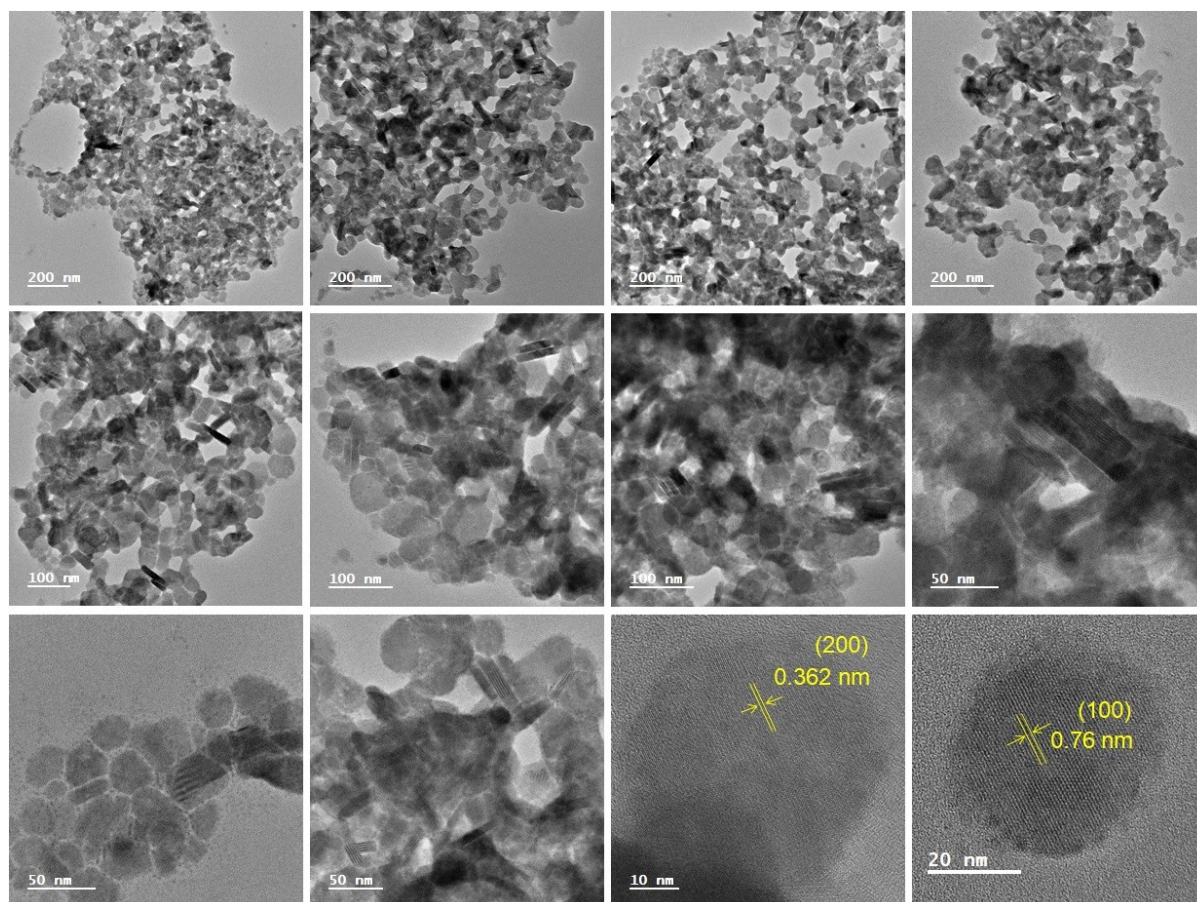

**Figure S2.** Additional TEM and HRTEM images of  $\text{Cs}_3\text{Bi}_2\text{I}_9$  NDs.

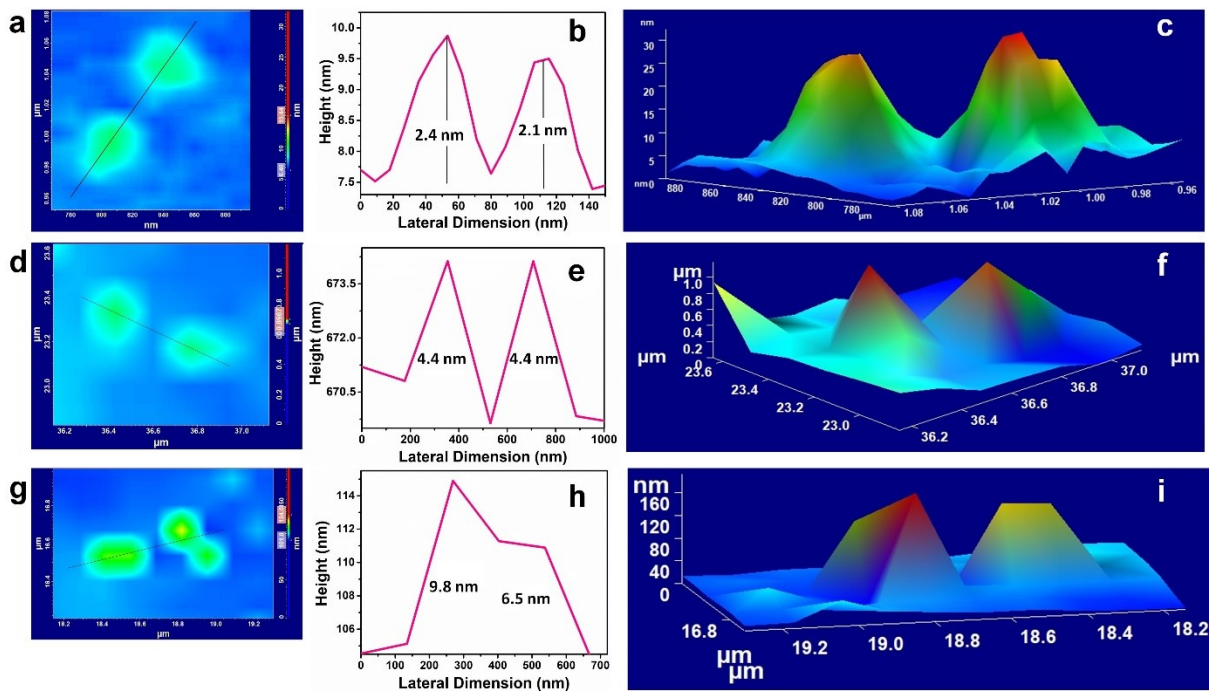

**Figure S3.** AFM image, height profile and 3D AFM image of  $\text{Cs}_3\text{Bi}_2\text{I}_9$  NDs prepared with reaction times of (a-c) 3 s, (d-f) 15 s, and (g-i) 60 s.

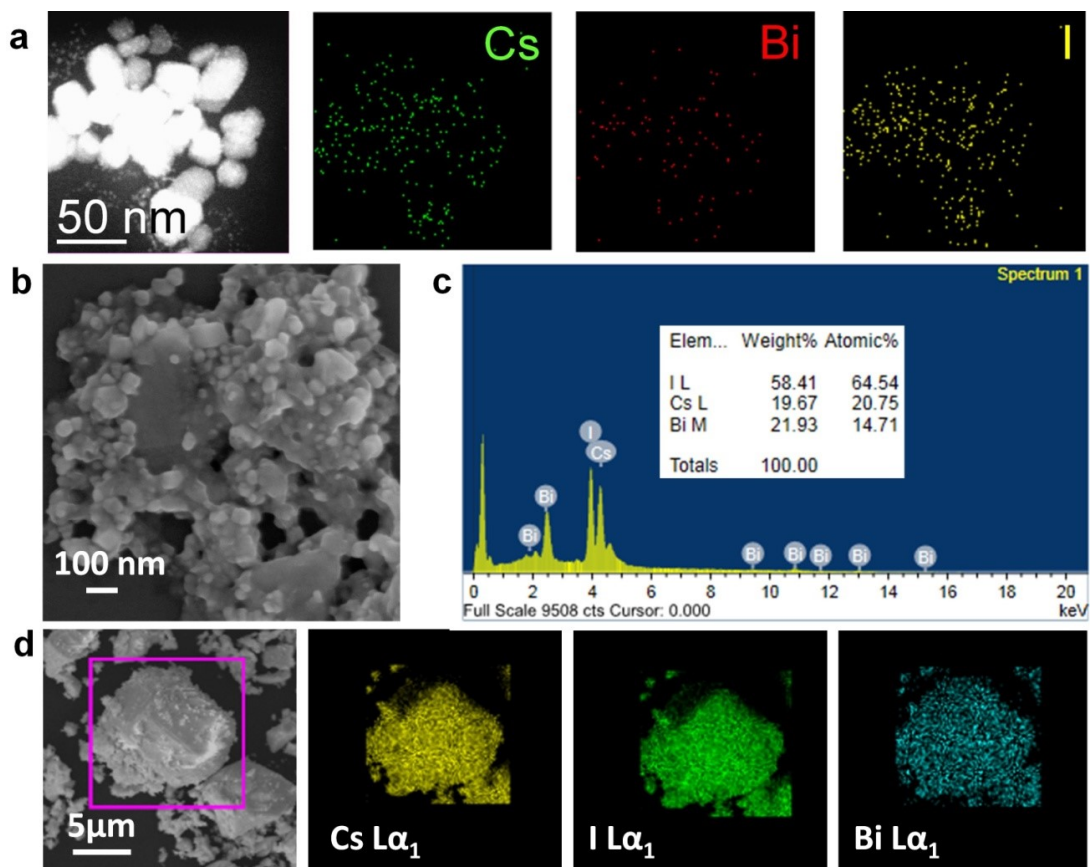

**Figure S4.** (a) HAADF-STEM mapping showing the elemental distribution. (b) FE-SEM image of agglomerated  $\text{Cs}_3\text{Bi}_2\text{I}_9$  ND clusters. (c) EDAX spectrum showing surface elemental stoichiometry of the NDs. (d) Elemental mapping from a selected region shown on the left.

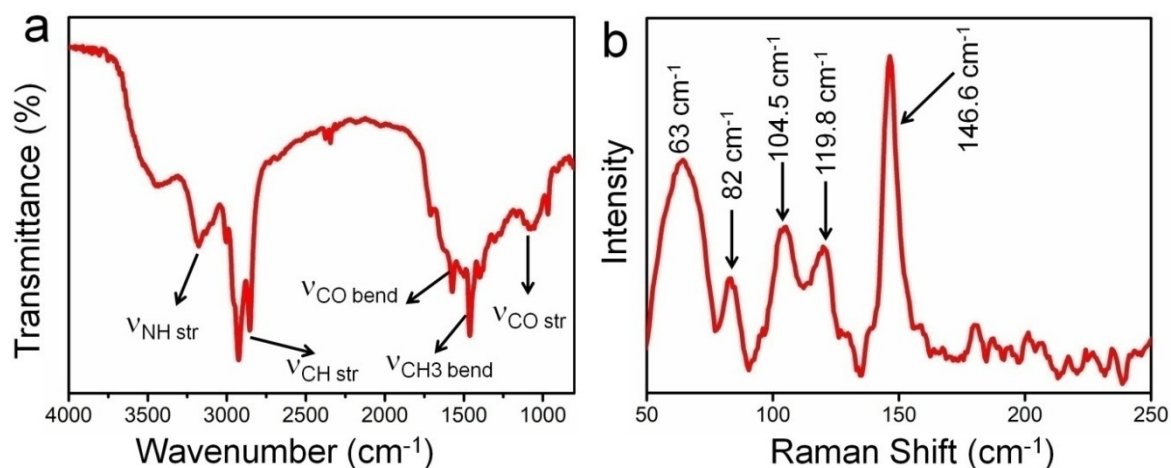

**Figure S5.** (a) FTIR and (b) Raman spectra of  $\text{Cs}_3\text{Bi}_2\text{I}_9$  NDs.

Raman spectral bands

63  $\text{cm}^{-1}$   
 82  $\text{cm}^{-1}$   
 104.5  $\text{cm}^{-1}$   
 119.8  $\text{cm}^{-1}$   
 146.6  $\text{cm}^{-1}$

Assignment

bending mode of Bi-I  
 asymmetric stretching of bridged Bi-I  
 symmetric stretch of bridging Bi-I  
 asymmetric stretching of terminal Bi-I  
 symmetric stretching of terminal Bi-I

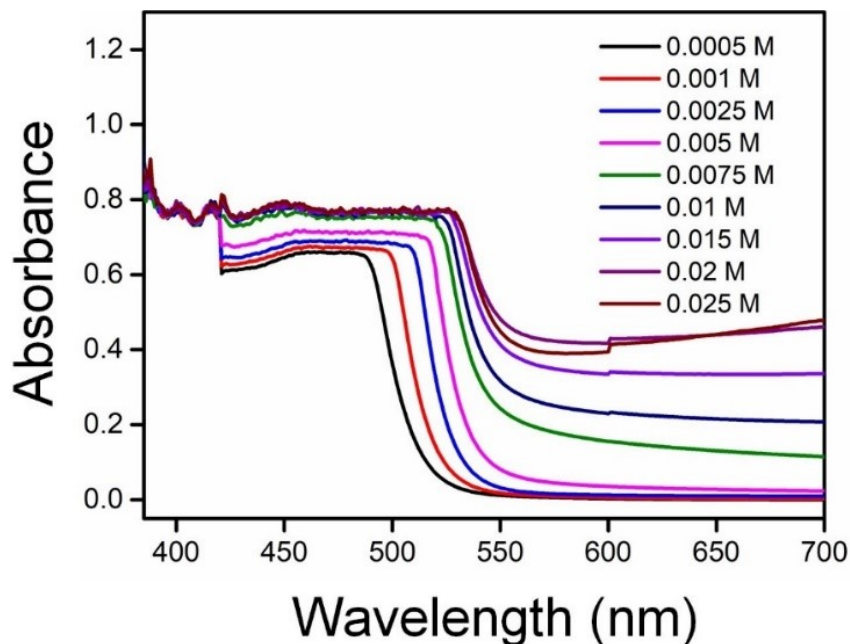

**Figure S6.** Absorption spectra of  $\text{Cs}_3\text{Bi}_2\text{I}_9$  NDs in 6.34M aqueous HI with different molar concentrations of the NDs (in  $\text{mol L}^{-1}$ ).



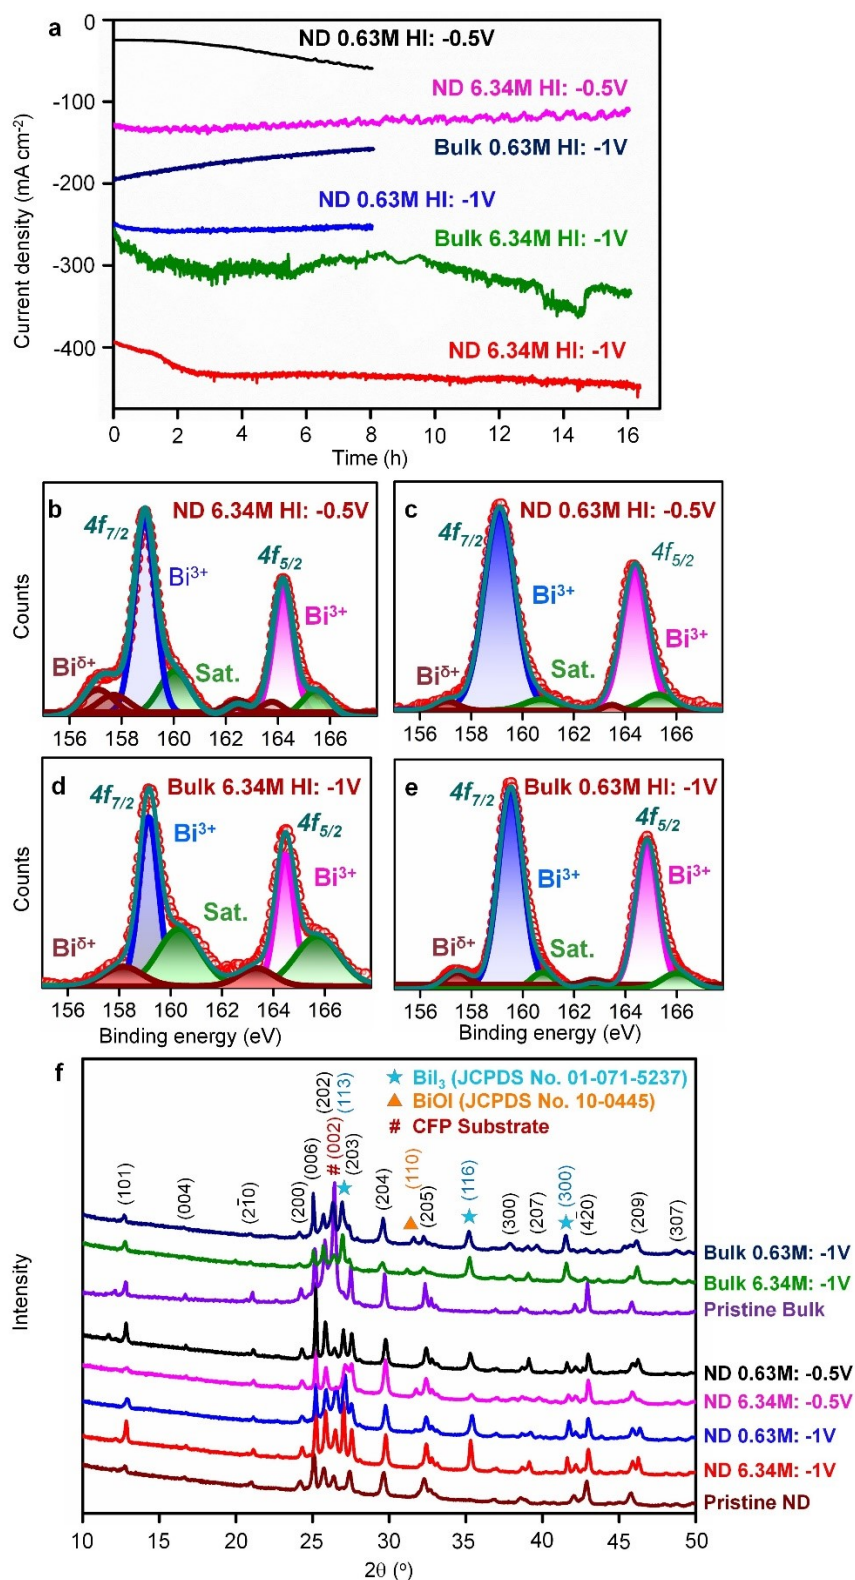

**Figure S7.** (a) Chronoamperometric stability plots of  $\text{Cs}_3\text{Bi}_2\text{I}_9$  NDs at -0.5V and -1V versus SCE where 0.66  $\text{mg/cm}^2$  ND loaded CFP was dipped inside 0.005M ND saturated 0.63M and 6.34M HI solutions. Fitted XPS Bi 4f level for the NDs in (b) 6.34M HI at -0.5V after 16h, (c) 0.63M HI at -0.5V after 8h, and for the bulk  $\text{Cs}_3\text{Bi}_2\text{I}_9$  in (d) 6.34M HI at -1V after 16h, (e) 0.63M HI at -1V after 8h. The open circles are the experimental data, and the solid line represent the best fit. Sat. denotes the satellite peaks. (f) PXRD patterns of the NDs and bulk  $\text{Cs}_3\text{Bi}_2\text{I}_9$  after the electrochemical stability tests.

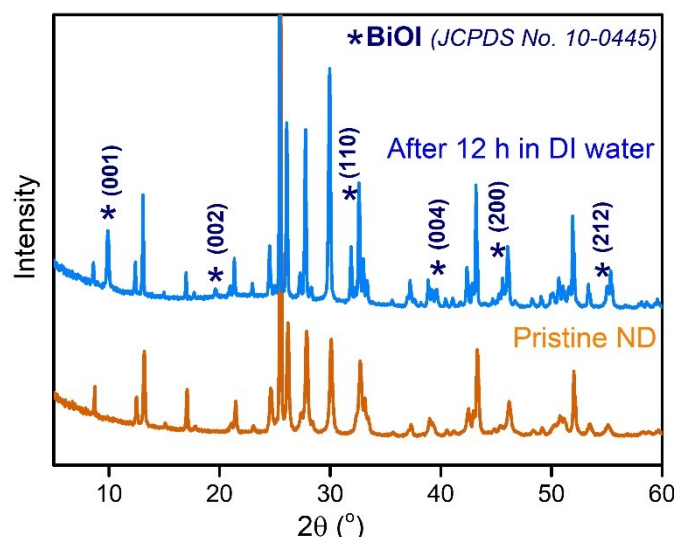

**Figure S8.** PXRD pattern of  $\text{Cs}_3\text{Bi}_2\text{I}_9$  NDs before and after dispersing in DI water for 12h.

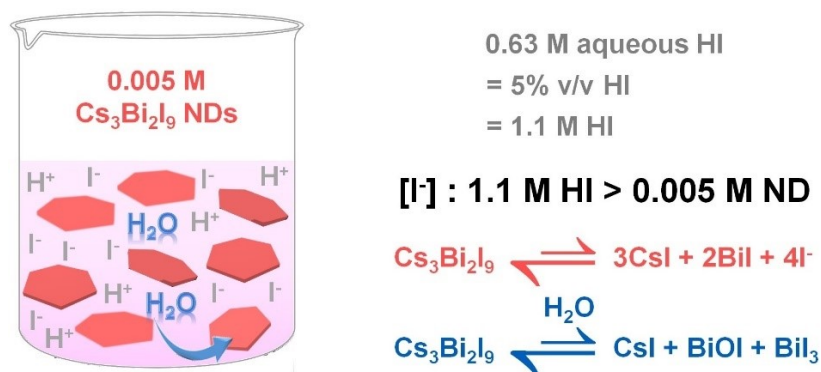

**Figure S9.** Schematic showing the plausible reason for the  $\text{Cs}_3\text{Bi}_2\text{I}_9$  ND stability in 0.63 M saturated HI solution.

**Table S1.** XPS fitting parameters of  $\text{Cs}_3\text{Bi}_2\text{I}_9$  ND and bulk phases after chronoamperometry tests at -0.5 and -1.0 V versus SCE, for 16h in 6.34M HI and 8h in 0.63M HI solution.

| Condition                                                                       | XPS levels | BE ( $\text{Bi}^{\delta+}$ ) | Area ( $\text{Bi}^{\delta+}$ ) | BE ( $\text{Bi}^{3+}$ ) | Area ( $\text{Bi}^{3+}$ ) | BE (Sat.) | Area (Sat.) | $\text{Bi}^{\delta+}$ Wt % | Av. $\text{Bi}^{\delta+}$ Wt% | Av. $\text{Bi}^{3+}$ Wt% |
|---------------------------------------------------------------------------------|------------|------------------------------|--------------------------------|-------------------------|---------------------------|-----------|-------------|----------------------------|-------------------------------|--------------------------|
| <b><math>\text{Cs}_3\text{Bi}_2\text{I}_9</math> NDs post chronoamperometry</b> |            |                              |                                |                         |                           |           |             |                            |                               |                          |
| 6.34 M<br>-0.5 V                                                                | $4f_{7/2}$ | 157.1                        | 1155.6                         | 158.9                   | 3211.9                    | 160.0     | 1059.7      | 26.5                       | 22                            | 78                       |
|                                                                                 | $4f_{5/2}$ | 162.5                        | 443.2                          | 164.2                   | 1985.4                    | 165.5     | 518.8       | 18.2                       |                               |                          |
| 6.34 M<br>-1.0 V                                                                | $4f_{7/2}$ | 157.0                        | 2252.7                         | 159.2                   | 4518.0                    | 160.2     | 819.9       | 33.2                       | 28                            | 72                       |
|                                                                                 | $4f_{5/2}$ | 162.3                        | 957.5                          | 164.6                   | 3074.0                    | 165.6     | 934.6       | 23.7                       |                               |                          |
| 0.63 M<br>-0.5 V                                                                | $4f_{7/2}$ | 157.1                        | 47.4                           | 159.1                   | 1401.9                    | 160.8     | 88.7        | 3.3                        | 3                             | 97                       |
|                                                                                 | $4f_{5/2}$ | 163.5                        | 19.7                           | 164.4                   | 829.3                     | 165.3     | 110.9       | 2.3                        |                               |                          |
| 0.63 M<br>-1.0 V                                                                | $4f_{7/2}$ | 157.6                        | 249.4                          | 159.1                   | 1907.1                    | 160.0     | 172.8       | 11.5                       | 7                             | 93                       |
|                                                                                 | $4f_{5/2}$ | 163.3                        | 40.5                           | 164.4                   | 1449.2                    | 165.5     | 146.2       | 2.7                        |                               |                          |

| Bulk Cs <sub>3</sub> Bi <sub>2</sub> I <sub>9</sub> post chronoamperometry |                   |       |       |       |        |       |       |      |    |    |
|----------------------------------------------------------------------------|-------------------|-------|-------|-------|--------|-------|-------|------|----|----|
| 6.34 M<br>-1.0 V                                                           | 4f <sub>7/2</sub> | 158.1 | 126.8 | 159.1 | 549.0  | 160.3 | 409.8 | 18.8 | 19 | 81 |
|                                                                            | 4f <sub>5/2</sub> | 163.3 | 105.6 | 164.4 | 417.6  | 165.7 | 372.7 | 20.2 |    |    |
| 0.63 M<br>-1.0 V                                                           | 4f <sub>7/2</sub> | 157.5 | 750.5 | 159.5 | 8331.7 | 160.8 | 657.2 | 8.3  | 6  | 94 |
|                                                                            | 4f <sub>5/2</sub> | 162.8 | 164.3 | 164.8 | 5706.0 | 166.0 | 830.4 | 2.8  |    |    |

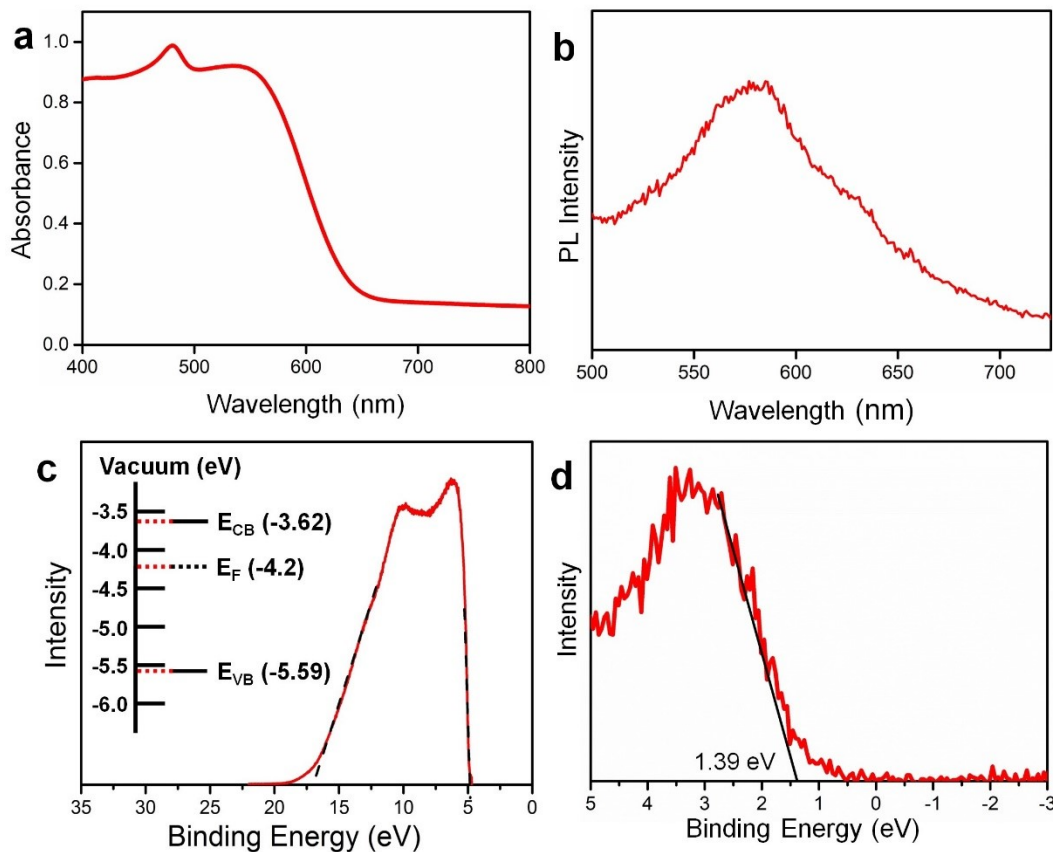

**Figure S10.** (a) Absorption spectrum, (b) PL spectrum, (c) UV photoelectron spectrum with inset showing the band alignment, and (d) valence band XPS spectrum of Cs<sub>3</sub>Bi<sub>2</sub>I<sub>9</sub> NDs.

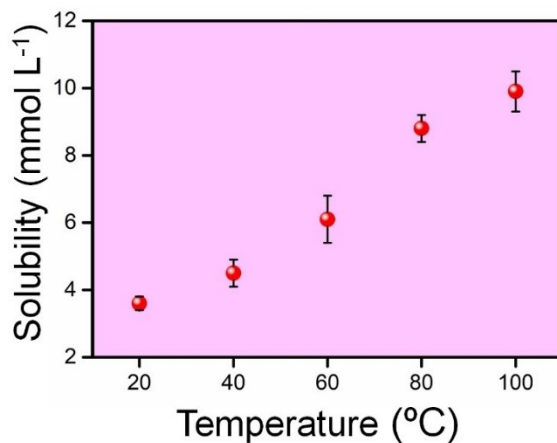

**Figure S11.** Solubility plot of Cs<sub>3</sub>Bi<sub>2</sub>I<sub>9</sub> NDs in 6.34M (50%) aqueous HI solution at different temperatures. Error bars indicate standard deviation from three trials.

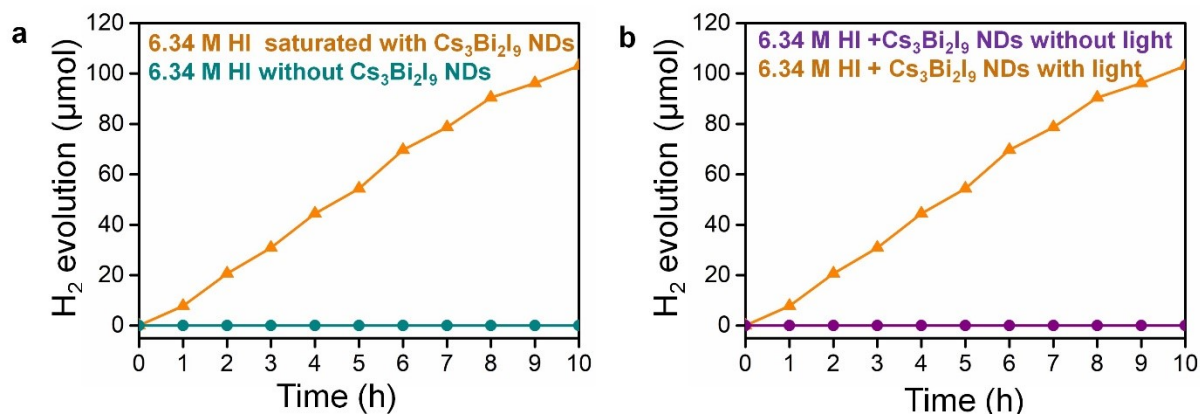

**Figure S12.** (a) Photocatalytic H<sub>2</sub> evolution by splitting of aqueous HI solution in the presence (saturation) and absence of Cs<sub>3</sub>Bi<sub>2</sub>I<sub>9</sub> NDs. (b) Photocatalytic H<sub>2</sub> evolution from 6.34M HI solution saturated by 0.005M Cs<sub>3</sub>Bi<sub>2</sub>I<sub>9</sub> NDs under dark condition and in the presence of visible light illumination.

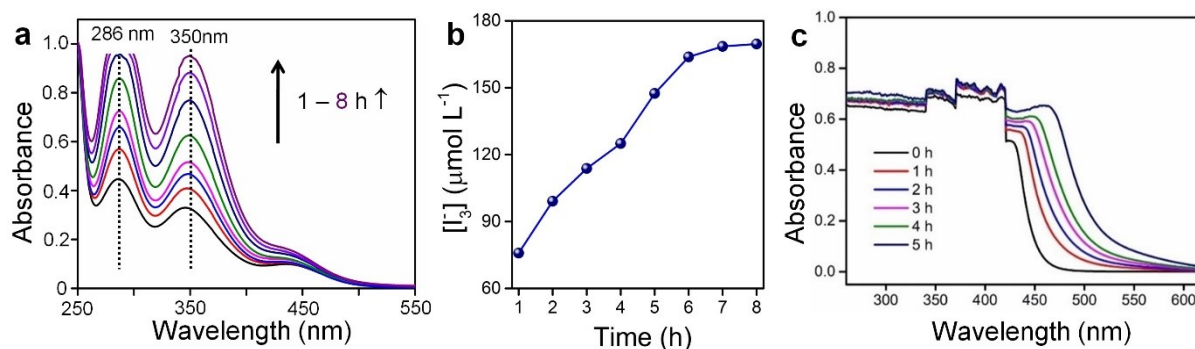

**Figure S13.** (a) Absorption spectra showing the temporal emergence of I<sub>3</sub><sup>-</sup> ions. (b) Time dependent increase of I<sub>3</sub><sup>-</sup> concentration, measured using the absorbance band at 350 nm. (c) Absorption spectra showing the absence of I<sub>3</sub><sup>-</sup> ions during the photocatalytic reaction in 6.34M HBr solution saturated by 0.005M Cs<sub>3</sub>Bi<sub>2</sub>I<sub>9</sub> NDs.

### Discussion S1. Quantum yield calculation

The quantum efficiency of HI splitting was estimated by calculating the apparent quantum efficiency (AQE) according to equation (S1):

$$AQE = \frac{\text{Evolved } H_2(\text{mol}) \times 6.02 \times 10^{23} \times 2 \times 0.33(\text{eV}) \times 1.6 \times 10^{-19}}{P_{sol}(\text{Wcm}^{-2}) \times \text{Area}(\text{cm}^2) \times \text{time}(\text{s})} \quad (\text{S1})$$

The evolved gas by photocatalytic HI splitting = 11.3 μmol h<sup>-1</sup>;



Avogadro Number =  $6.022 \times 10^{23}$ ;

$P_{sol}$  is the power density of the incident monochromatic light = 450 W lamp calibrated to 150 mWcm<sup>-2</sup>; Area = Irradiated area to produce (mol) of hydrogen = 0.2 cm<sup>2</sup>;

Irradiated time = 1 h = 3600 s; Electronic charge =  $1.6 \times 10^{-19}$  C

Since H<sup>+</sup>/H<sub>2</sub> reduction potential is 0.046V versus NHE and I<sup>-</sup>/I<sub>3</sub><sup>-</sup> oxidation potential is 0.376V versus NHE, the total potential for HI splitting is 0.376 V – 0.046 V = 0.33 V.

Hence, AQE is calculated as 0.66 % ~ 0.7%. With H<sub>3</sub>PO<sub>2</sub> and Pt co-catalyst, 22.5 μmol h<sup>-1</sup> H<sub>2</sub> is equivalent to a quantum efficiency of 1.3%.

**Table S2.** Comparative list of the photocatalytic HI splitting activity by pristine and composite metal-halide perovskites with respect to Cs<sub>3</sub>Bi<sub>2</sub>I<sub>9</sub> NDs.

| Photocatalysts                                                                                             | Light source<br>(λ in nm)                       | Reaction medium  | H <sub>2</sub> activity                    | Ref.      |
|------------------------------------------------------------------------------------------------------------|-------------------------------------------------|------------------|--------------------------------------------|-----------|
| Cs <sub>3</sub> Bi <sub>2</sub> I <sub>9</sub> NDs                                                         | 150 mW cm <sup>-2</sup><br>Xe lamp (λ ≥ 420 nm) | Saturated HI     | 11.3 μmol h <sup>-1</sup>                  | This work |
| Cs <sub>3</sub> Bi <sub>2</sub> I <sub>9</sub> NDs /Pt                                                     | 150 mW cm <sup>-2</sup><br>Xe lamp (λ ≥ 420 nm) | Saturated HI     | 22.5 μmol h <sup>-1</sup>                  | This work |
| MAPbI <sub>3</sub>                                                                                         | 300 W Xe lamp<br>(λ > 475 nm)                   | Saturated HI     | 30.0 μmol h <sup>-1</sup> g <sup>-1</sup>  | S1        |
| MAPbI <sub>3</sub> /Pt                                                                                     | 100 W solar simulator<br>(λ > 475 nm)           | Saturated HI     | 57 μmol h <sup>-1</sup> g <sup>-1</sup>    | S1        |
| MAPbBr <sub>3-x</sub> I <sub>x</sub> /Pt                                                                   | 300 W Xe lamp<br>(λ ≥ 420 nm)                   | Saturated HI/HBr | 651.2 μmol h <sup>-1</sup>                 | S2        |
| CsPbBr <sub>3-x</sub> I <sub>x</sub> /Pt                                                                   | 300 W Xe lamp<br>(λ ≥ 420 nm)                   | Saturated HI/HBr | 224 μmol h <sup>-1</sup>                   | S3        |
| MAPbI <sub>3</sub> /Pt/TiO <sub>2</sub>                                                                    | 300 W Xe lamp<br>(λ > 420 nm)                   | Saturated HI     | 29 μmol h <sup>-1</sup>                    | S4        |
| MAPbI <sub>3</sub> /rGO                                                                                    | 300 W Xe lamp<br>(λ ≥ 420 nm)                   | Saturated HI     | 93.9 μmol h <sup>-1</sup>                  | S5        |
| MAPb(I <sub>0.9</sub> Br <sub>0.1</sub> ) <sub>3</sub>                                                     | 300 W Xe lamp<br>(λ ≥ 420 nm)                   | Saturated HI/HBr | 1471 μmol h <sup>-1</sup> g <sup>-1</sup>  | S6        |
| Ni <sub>3</sub> C/MAPbI <sub>3</sub>                                                                       | 300 W Xe lamp<br>(λ ≥ 420 nm)                   | Saturated HI     | 2362 μmol h <sup>-1</sup> g <sup>-1</sup>  | S7        |
| MA <sub>3</sub> Bi <sub>2</sub> I <sub>9</sub> /Pt                                                         | 300 W<br>(λ ≥ 400 nm)                           | Saturated HI     | 169 μmol h <sup>-1</sup>                   | S8        |
| MAPbI <sub>3</sub> /<br>(piezoelectric)                                                                    | 100 mW cm <sup>-2</sup><br>(λ ≥ 420 nm)         | Saturated HI     | 23.30 μmol h <sup>-1</sup>                 | S9        |
| [(CH <sub>3</sub> ) <sub>2</sub> NH <sub>2</sub> ] <sub>3</sub> [BiI <sub>6</sub> ]<br>(PtI <sub>x</sub> ) | 465 nm LED                                      | Saturated HI     | ---                                        | S10       |
| MA <sub>3</sub> Bi <sub>2</sub> I <sub>9</sub> /<br>DMA <sub>3</sub> BiI <sub>6</sub>                      | 300 W Xe lamp<br>(λ ≥ 420 nm)                   | Saturated HI     | 198.2 μmol h <sup>-1</sup> g <sup>-1</sup> | S11       |
| MAPbI <sub>3</sub> /cobalt<br>phosphide                                                                    | 150 W Xe lamp (λ ≥<br>420 nm)                   | Saturated HI     | 785.9 μmol h <sup>-1</sup> g <sup>-1</sup> | S12       |
| Cs <sub>3</sub> Bi <sub>0.6</sub> Sb <sub>1.4</sub> I <sub>9</sub>                                         | 100 W solar simulator                           | Saturated HI     | 92.6 μmol h <sup>-1</sup>                  | S13       |

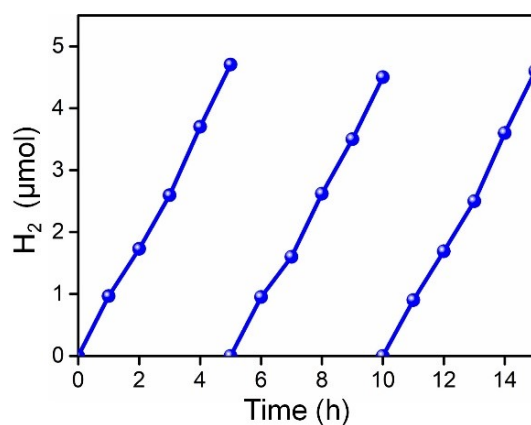

**Figure S14.** Recyclability test of the NDs for three 5h runs in 0.63M aqueous HI.

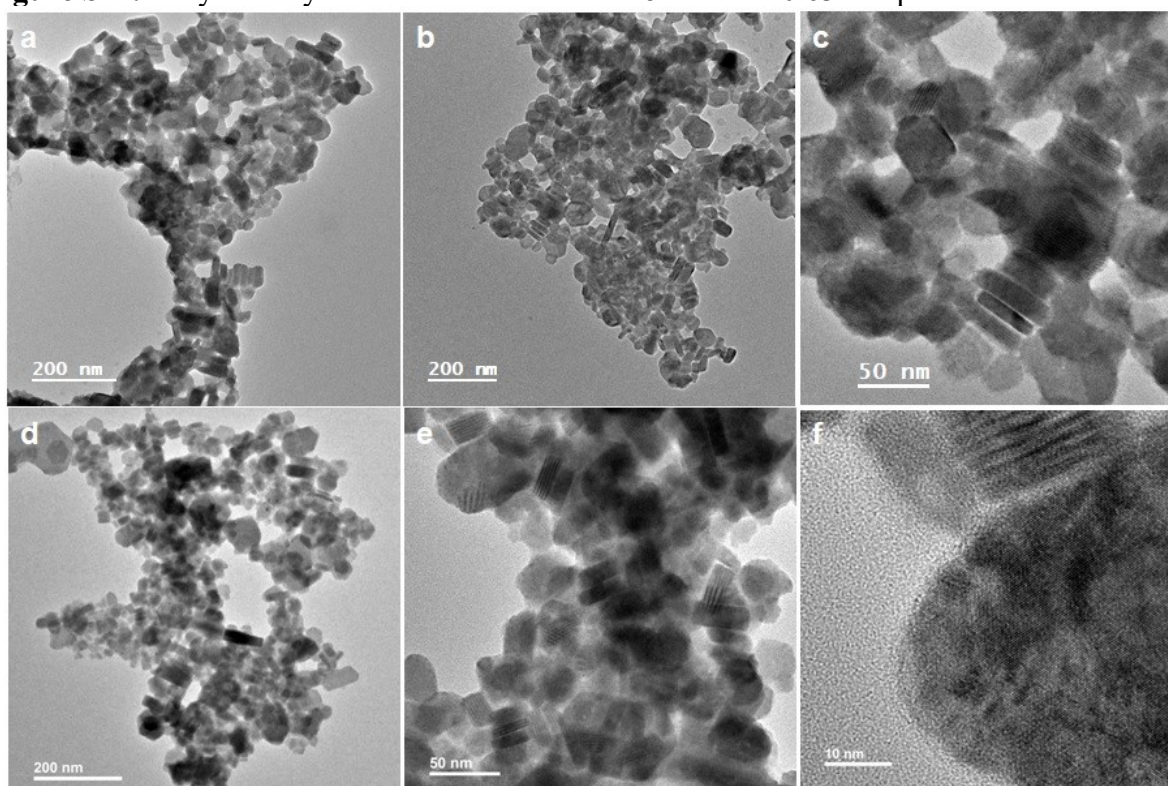

**Figure S15.** Additional TEM images of Cs<sub>3</sub>Bi<sub>2</sub>I<sub>9</sub> NDs after 10h photocatalysis in 0.005 M ND saturated (a-c) 6.34 M and (d-f) 0.63 M aqueous HI solutions.

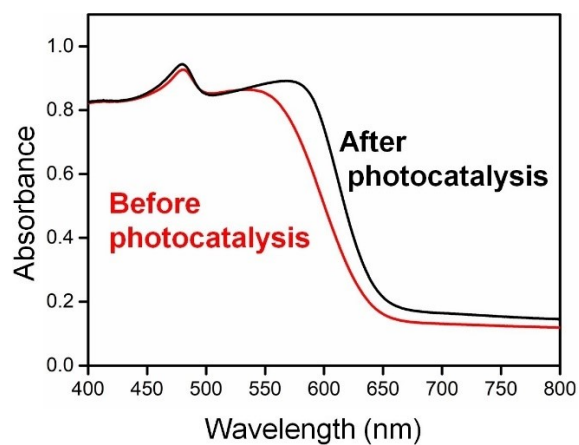

**Figure S16.** Absorption spectra of  $\text{Cs}_3\text{Bi}_2\text{I}_9$  NDs before and after 10h photocatalysis.

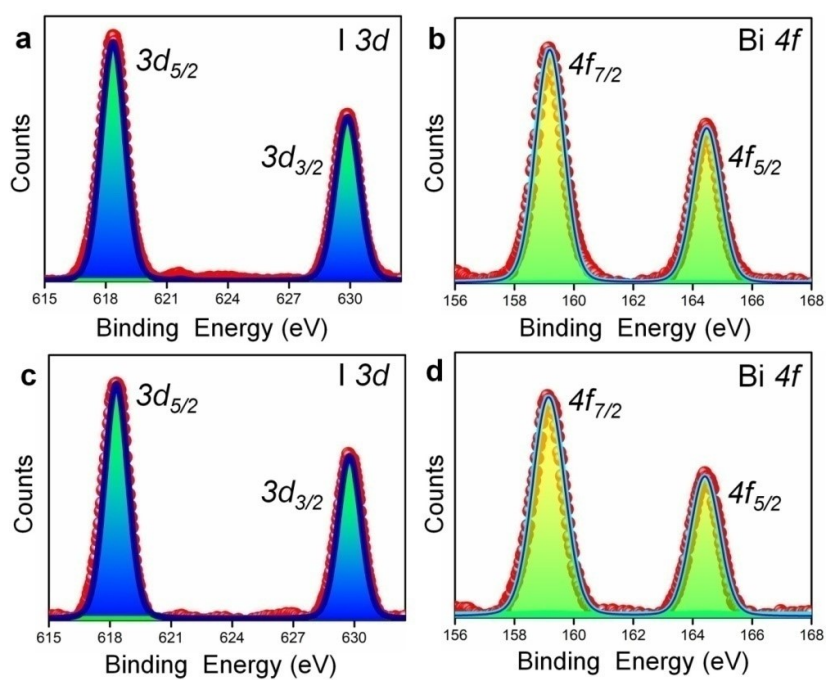

**Figure S17.** XPS spectra of  $\text{Cs}_3\text{Bi}_2\text{I}_9$  NDs (a, b) before and (c, d) after photocatalysis. The C  $1s$  binding energy of 284.8 eV was used as reference.

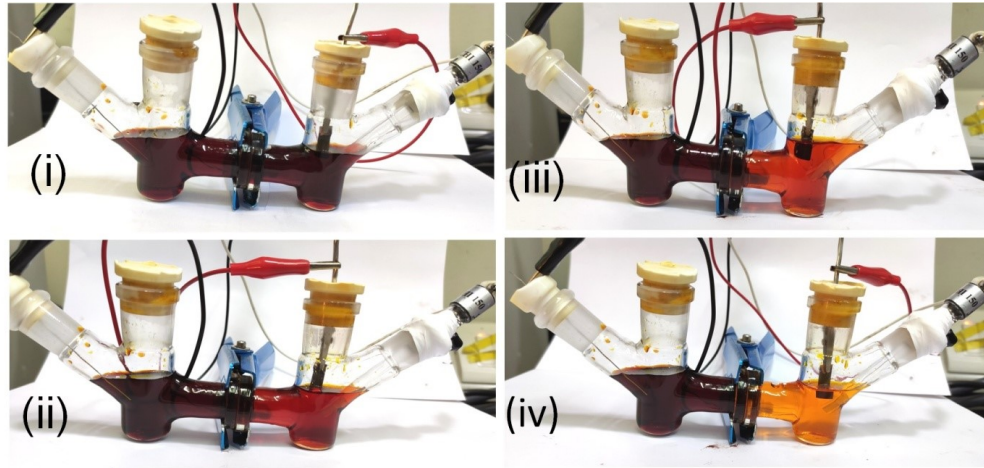

**Figure S18.** (a) Digital images of the H-cell containing ND saturated aqueous HI solution (i) before, and after electrochemical reduction for (ii) 1h, (iii) 2h, and (iv) 3h. A proton exchange membrane (Nafion) between left and the right slots of the H-cell, allows the solution color to change exclusively in the right slot from dark brown to light yellowish orange due to the continuous electrochemical reduction of  $I_3^-$  to  $I^-$  over time.

### Discussion S2: TOF calculation

The number of hydrogen turnover is calculated from the current density according to:

$$\text{Number of hydrogen turnover} = \left( j \frac{\text{mA}}{\text{cm}^2} \right) \left( \frac{1 \text{ C/s}}{1000 \text{ mA}} \right) \left( \frac{1 \text{ mol } e^-}{96485.3 \text{ C}} \right) \left( \frac{1 \text{ mol } H_2}{2 \text{ mol } e^-} \right) \times (6.023 \times 10^{23})$$

#### For 6.34M HI Saturated $Cs_3Bi_2I_9$ NDs

Specific capacitance ( $C_s$ ) = 0.04 mF/cm<sup>2</sup>

Double layer capacitance ( $C_{dl}$ ) = 2.4 mF

$$\text{ECSA} = \frac{C_{dl}}{C_s} = \frac{2.4}{0.04} = 60 \text{ cm}^2$$

At 533 mV overpotential,  $Cs_3Bi_2I_9$  NDs reach a current density of -100 mAcm<sup>-2</sup>.

Number of hydrogen turnover for  $Cs_3Bi_2I_9$  NDs at 533 mV overpotential:

$$\left( 100 \frac{\text{mA}}{\text{cm}^2} \right) \left( \frac{1 \text{ C/s}}{1000 \text{ mA}} \right) \left( \frac{1 \text{ mol } e^-}{96485.3 \text{ C}} \right) \left( \frac{1 \text{ mol } H_2}{2 \text{ mol } e^-} \right) \times (6.023 \times 10^{23}) = 3.1212 \times 10^{17} \left( \frac{1/\text{s}}{\text{cm}^2} \right)$$



Based on ECSA along with the unit cell volume ( $1295.66 \text{ \AA}^3$ ) of  $\text{Cs}_3\text{Bi}_2\text{I}_9$  NDs, active sites per real surface area:

$$\text{Active Surface sites} = \left( \frac{2 \text{ atom/unit cell}}{1293.96 \text{ \AA}^3/\text{unit cell}} \right)^{2/3} = 0.0133 \times 10^{16} \text{ atoms cm}^{-2}_{\text{real}}$$

$$3.122 \times 10^{17} \left( \frac{1/\text{s}}{\text{cm}^2} \right) \times 0.3 \text{ cm}^2$$

$$\text{TOF} (\eta_{533}) = \frac{\text{Active Surface sites} \times \text{ECSA}}{\text{Current}} = 11.736 \text{ s}^{-1}$$

Therefore, TOF of  $\text{Cs}_3\text{Bi}_2\text{I}_9$  NDs for HER is  $11.7 \text{ s}^{-1}$  at an overpotential of 533 mV.

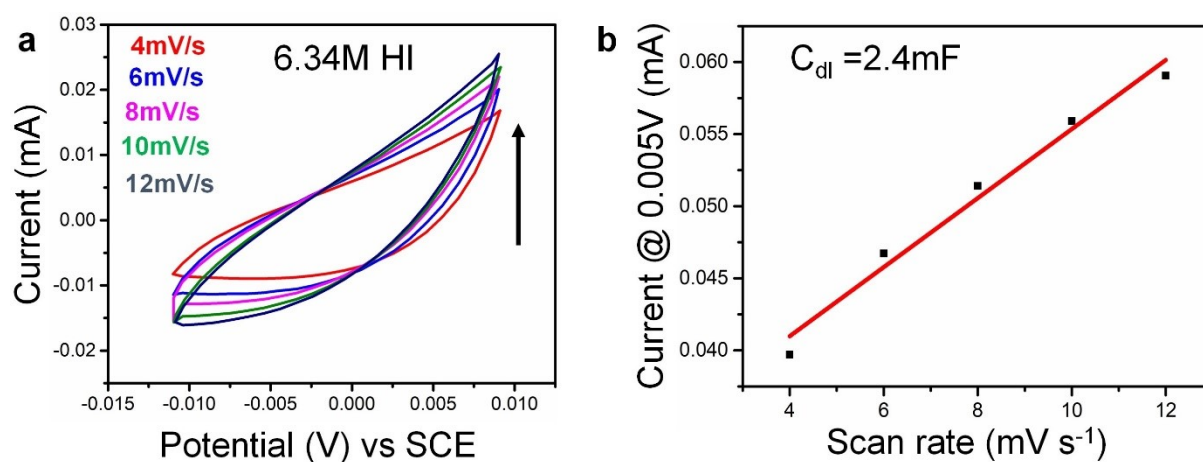

**Figure S19.** ECSA determination of  $\text{Cs}_3\text{Bi}_2\text{I}_9$  ND electrocatalyst. (a) CV cycles at different scan rates. (b) Current density as function of scan rate at fixed overpotential.

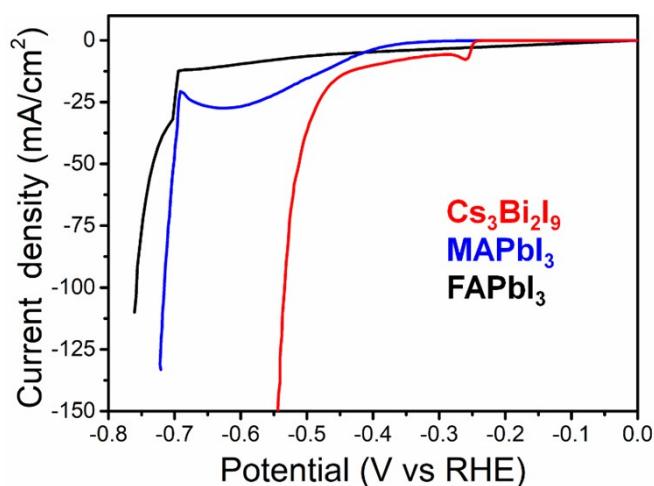

**Figure S20.** LSV polarization curves showing the electrochemical HER activity of  $\text{Cs}_3\text{Bi}_2\text{I}_9$  NDs,  $\text{MAPbI}_3$  and  $\text{FAPbI}_3$  [MA:  $\text{CH}_3\text{NH}_3$ , FA:  $\text{HC}(\text{NH}_2)_2$ ].

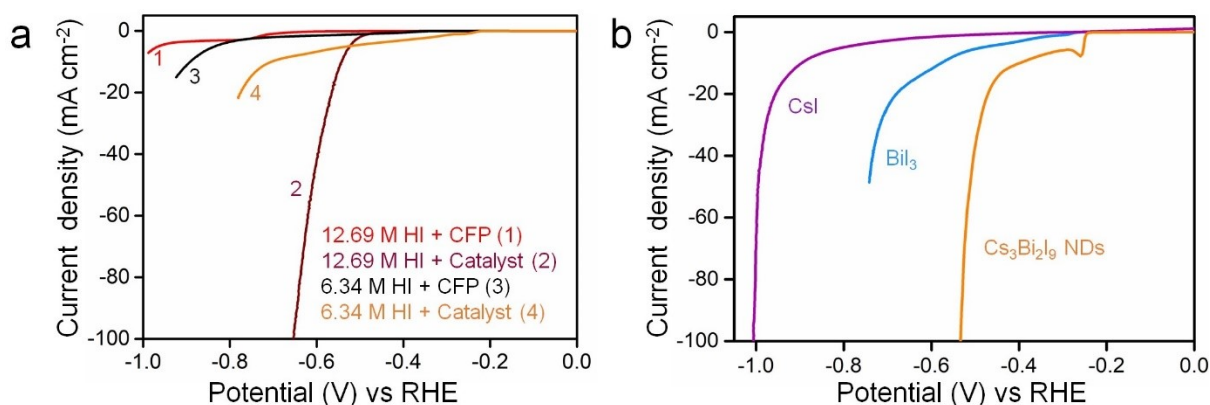

**Figure S21.** (a) LSV polarization plots in different electrolyte and catalyst combinations. (b) Comparison of electrochemical HI splitting activity of Cs<sub>3</sub>Bi<sub>2</sub>I<sub>9</sub> NDs with CsI and BiI<sub>3</sub>.

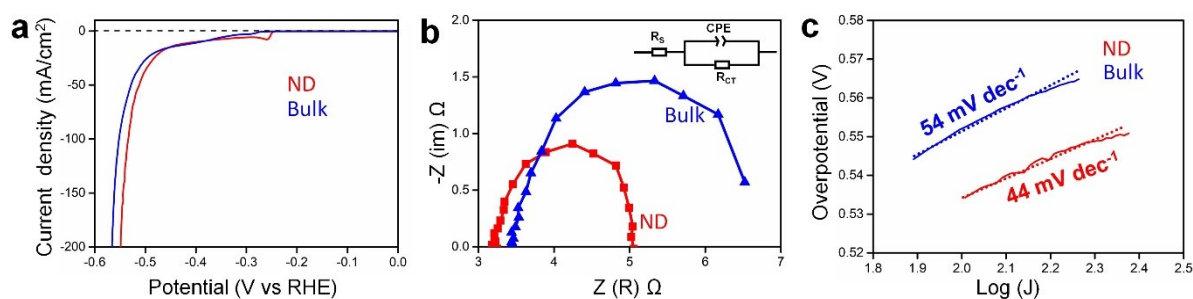

**Figure S22.** Comparison of the electrocatalytic HER activity between the NDs and bulk Cs<sub>3</sub>Bi<sub>2</sub>I<sub>9</sub> in 6.34M HI. (a) LSV polarization plots, (b) Nyquist plots measured at 700 mV overpotential (*iR* uncorrected), and (c) Tafel plots with the corresponding Tafel slopes.

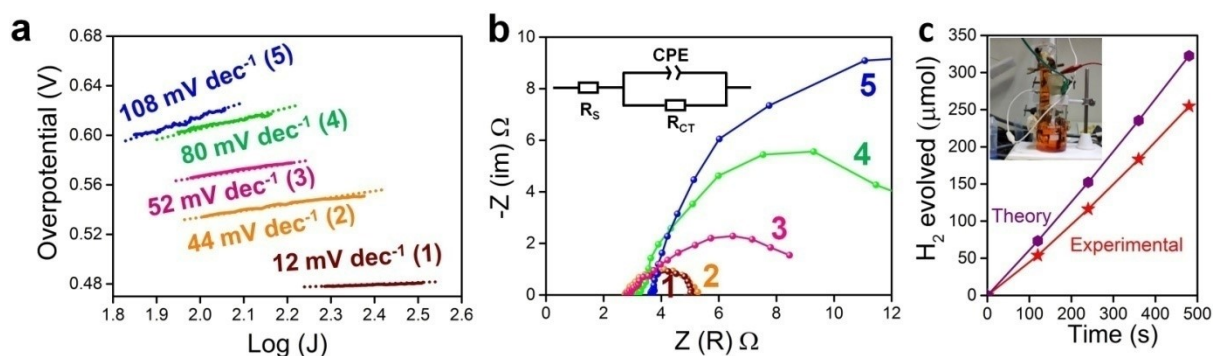

**Figure S23.** (a) Tafel plots and their corresponding Tafel slopes. (b) Nyquist plots measured at 700 mV overpotential (*iR* uncorrected) for HER. Inset shows the equivalent circuit (R<sub>s</sub>: solution resistance; CPE: constant phase element; R<sub>CT</sub>: charge transfer resistance). (c) Faradaic efficiency measured at 1V overpotential (*iR* uncorrected) showing the theoretically calculated and experimentally measured H<sub>2</sub> gas with time. Inset shows digital image of the measurement setup. The samples: (1) 12.69 M HI, (2) 6.34 M HI, (3) 3.17 M HI, (4) 1.26 M HI, and (5) 0.63 M HI.

## Supporting References

S1 S. Park, W. Chang, C. Lee, S. Park, H. Ahn, K. Nam, *Nat. Energy*, 2017, **2**, 16185.

S2 Y. Wu, P. Wang, Z. Guan, J. Liu, Z. Wang, Z. Zheng, S. Jin, Y. Dai, M. Whangbo, B. Huang, *ACS Catal.*, 2018, **8**, 10349-10357.

S3 Z. Guan, Y. Wu, P. Wang, Q. Zhang, Z. Wang, Z. Zheng, Y. Liu, Y. Dai, M. Whangbo, B. Huang, *Appl. Catal. B: Environ.*, 2019, **245**, 522-527.

S4 X. Wang, H. Wang, H. Zhang, W. Yu, X. Wang, Y. Zhao, X. Zong, C. Li, *ACS Energy Lett.*, 2018, **3**, 1159-1164.

S5 Y. Wu, P. Wang, X. Zhu, Q. Zhang, Z. Wang, Y. Liu, G. Zou, Y. Dai, M. Whangbo, B. Huang, *Adv. Mater.*, 2018, **30**, 1704342.

S6 Z. Zhao, J. Wu, Y. Zheng, N. Li, X. Li, Z. Ye, S. Lu, X. Tao, C. Chen, *Appl. Catal. B: Environ.*, 2019, **253**, 41-48.

- S7 Z. Zhao, J. Wu, Y. Zheng, N. Li, X. Li, X. Tao, *ACS Catal.*, 2019, **9**, 8144-8152.
- S8 Y. Guo, G. Liu, Z. Li, Y. Lou, J. Chen, Y. Zhao, *ACS Sustain. Chem. Eng.*, 2019, **7**, 15080-15085.
- S9 M. Wang, Y. Zuo, J. Wang, Y. Wang, X. Shen, B. Qiu, L. Cai, F. Zhou, S. Lau, Y. Chai, *Adv. Energy Mater.*, 2019, **9**, 1901801.
- S10 H. Zhao, Y. Li, B. Zhang, T. Xu, C. Wang, *Nano Energy*, 2018, **50**, 665-674.
- S11 Y. Tang, C. Mak, R. Liu, Z. Wang, L. Ji, H. Song, C. Tan, F. Barrière, H. Hsu, *Adv. Funct. Mater.*, 2020, **30**, 2006919.
- S12 C. Cai, Y. Teng, J. Wu, J. Li, H. Chen, J. Chen, D. Kuang, *Adv. Funct. Mater.*, 2020, **30**, 2001478.
- S13 G. Chen, P. Wang, Y. Wu, Q. Zhang, Q. Wu, Z. Wang, Z. Zheng, Y. Liu, Y. Dai, B. Huang, *Adv. Mater.*, 2020, **32**, 2001344.
